# Supplementary material
Source: Research Square preprint supplement (doi:10.21203/rs.3.rs-9439399/v1)
Supplement: Supplementary file 2 [file 7fb94822ad037d624c1cc1c1.xlsx]

## Sheet: JAK2_GSEA_res
ID	Description	setSize	enrichmentScore	NES	pvalue	p.adjust	qvalue	rank	leading_edge	core_enrichment
KEGG_LEISHMANIA_INFECTION	KEGG_LEISHMANIA_INFECTION	70	0.632060373946776	1.89461265353282	0.0000000102208534685933	0.00000188063703822116	0.00000132333155435471	2989	tags=46%, list=16%, signal=39%	JAK2/FCGR1A/STAT1/TAB2/TLR4/MAPK14/IFNGR1/TLR2/IFNGR2/CR1/IRAK4/IL1B/NCF2/MYD88/FCGR2C/FCGR3B/FCGR2A/IL10/PTGS2/FCGR3A/NFKBIA/PRKCB/NCF4/ITGAM/MAPK3/TRAF6/NCF1/MAPK13/FOS/NFKB1/MAP3K7/IL1A
KEGG_NOD_LIKE_RECEPTOR_SIGNALING_PATHWAY	KEGG_NOD_LIKE_RECEPTOR_SIGNALING_PATHWAY	62	0.627241552424649	1.85726241814896	0.000000142007051953784	0.0000130646487797481	0.00000919308810016602	3472	tags=53%, list=18%, signal=44%	CARD6/CASP1/NAIP/ERBIN/TAB2/CASP5/CHUK/MAPK14/CARD8/TAB3/IL1B/RIPK2/IL18/NOD2/MEFV/NLRC4/XIAP/NFKBIA/CASP8/TNFAIP3/MAPK3/TRAF6/CCL2/MAPK13/NLRP3/NFKB1/BIRC2/MAP3K7/HSP90B1/TRIP6/CXCL1/HSP90AA1/CCL8
KEGG_TOLL_LIKE_RECEPTOR_SIGNALING_PATHWAY	KEGG_TOLL_LIKE_RECEPTOR_SIGNALING_PATHWAY	101	0.563085669361536	1.73337697957445	0.000000218823497217123	0.0000134211744959835	0.00000944396145884426	2870	tags=41%, list=15%, signal=35%	MAP2K6/STAT1/TLR1/TBK1/TAB2/TLR4/CHUK/LY96/MAPK14/TLR2/IFNAR1/TLR8/TLR6/PIK3CA/IRAK4/IL1B/MYD88/TLR5/PIK3CG/IRF7/IRF5/IFNAR2/RIPK1/MAP2K4/CXCL10/TICAM2/CXCL11/NFKBIA/CD14/CD86/CASP8/MAP3K8/PIK3CB/MAPK3/TRAF6/MAPK13/FOS/TLR7/PIK3R5/NFKB1/MAP3K7
KEGG_RIG_I_LIKE_RECEPTOR_SIGNALING_PATHWAY	KEGG_RIG_I_LIKE_RECEPTOR_SIGNALING_PATHWAY	69	0.602998860476296	1.80567272493194	0.000000553598093236613	0.0000203724098311073	0.0000143352769406533	2870	tags=38%, list=15%, signal=32%	TANK/TRIM25/TBK1/CHUK/IFIH1/MAPK14/DDX3X/MAP3K1/AZI2/IRF7/CYLD/CASP10/ISG15/DHX58/RIPK1/IFNK/CXCL10/NFKBIA/CASP8/TBKBP1/TRAF6/MAPK13/ATG12/ATG5/NFKB1/MAP3K7
KEGG_CHEMOKINE_SIGNALING_PATHWAY	KEGG_CHEMOKINE_SIGNALING_PATHWAY	186	0.494643687450821	1.5664544283738	0.0000004470041558264	0.0000203724098311073	0.0000143352769406533	3957	tags=37%, list=21%, signal=29%	JAK2/GNB4/ROCK1/ROCK2/STAT1/GNAI3/CHUK/CCR1/SOS2/VAV3/ADCY4/PIK3CA/GNG5/STAT2/PIK3CG/LYN/GNG10/PAK1/KRAS/PTK2B/PRKCD/GSK3B/BRAF/CXCL10/RAP1A/RAF1/CXCL11/CRK/NFKBIA/CXCR4/SOS1/GNG2/FGR/PRKCB/CXCR1/PIK3CB/ARRB2/STAT5B/MAPK3/CCR2/STAT3/NCF1/CCL2/CXCR2/HCK/NRAS/CDC42/DOCK2/GRB2/VAV1/PIK3R5/NFKB1/RAC2/SHC2/CXCL1/CXCL16/PREX1/RAC1/GNAI1/GNB1/WAS/RAP1B/CCL8/RHOA/GRK1/MAPK1/GNAI2/JAK3
KEGG_B_CELL_RECEPTOR_SIGNALING_PATHWAY	KEGG_B_CELL_RECEPTOR_SIGNALING_PATHWAY	75	0.555598706948316	1.67651033142124	0.00000873612100024915	0.000229635180577978	0.000161585395944458	4610	tags=53%, list=24%, signal=41%	DAPP1/IFITM1/PIK3AP1/CHUK/SOS2/VAV3/LILRB3/PIK3CA/PIK3CG/LYN/KRAS/BTK/GSK3B/NFAT5/RAF1/NFKBIA/SOS1/BCL10/PRKCB/PIK3CB/FCGR2B/MAPK3/PLCG2/NRAS/NFKBIE/PPP3CA/FOS/GRB2/VAV1/PIK3R5/NFKB1/RAC2/RAC1/INPP5D/MAPK1/NFATC4/PTPN6/PIK3CD/PPP3CB/SYK
KEGG_FC_GAMMA_R_MEDIATED_PHAGOCYTOSIS	KEGG_FC_GAMMA_R_MEDIATED_PHAGOCYTOSIS	96	0.535574041900627	1.64294725512535	0.00000760264142459136	0.000229635180577978	0.000161585395944458	3340	tags=44%, list=17%, signal=36%	FCGR1A/MARCKS/PLD1/PTPRC/VAV3/PLA2G4A/PIK3CA/FCGR2C/PIK3CG/ARPC5/FCGR2A/LYN/LIMK2/GAB2/PAK1/PRKCD/MYO10/FCGR3A/RAF1/CRK/ARPC2/PIKFYVE/PRKCB/ARPC3/PLA2G4D/PIK3CB/FCGR2B/MAPK3/NCF1/HCK/PLCG2/CDC42/DOCK2/VASP/VAV1/PIK3R5/PRKCE/RPS6KB1/ASAP1/RAC2/RAC1/WAS
KEGG_NATURAL_KILLER_CELL_MEDIATED_CYTOTOXICITY	KEGG_NATURAL_KILLER_CELL_MEDIATED_CYTOTOXICITY	131	0.501412141088016	1.56350724832794	0.000024992955391636	0.000574837974007629	0.000404491251733057	3298	tags=35%, list=17%, signal=29%	TNFSF10/SOS2/IFNGR1/VAV3/FAS/IFNAR1/IFNGR2/LCP2/PIK3CA/FCGR3B/PIK3CG/FCER1G/CASP3/MICB/PAK1/IFNAR2/KRAS/PTK2B/FCGR3A/BRAF/NFAT5/RAF1/SOS1/TNFRSF10C/HLA-B/TYROBP/PRKCB/HLA-E/HLA-C/PIK3CB/HLA-G/ICAM1/MAPK3/HLA-A/PLCG2/NRAS/PPP3CA/BID/GRB2/SH3BP2/VAV1/PIK3R5/RAC2/SHC2/CD48/RAC1
KEGG_NEUROTROPHIN_SIGNALING_PATHWAY	KEGG_NEUROTROPHIN_SIGNALING_PATHWAY	126	0.489467473475592	1.5237073293282	0.0000581539340236615	0.00118892487337264	0.000836600454375481	4434	tags=40%, list=23%, signal=31%	MAPK14/MAP3K5/SOS2/MAP3K1/PIK3CA/IRAK4/IRAK3/KIDINS220/YWHAZ/RIPK2/PIK3CG/SORT1/PSEN1/KRAS/PRKCD/GAB1/RPS6KA3/GSK3B/BRAF/RAP1A/RAF1/CALM2/CRK/NFKBIA/SOS1/PIK3CB/MAPK3/TRAF6/PLCG2/MAPK13/NRAS/NFKBIE/CDC42/GRB2/MAP3K3/NGF/FRS2/PIK3R5/NFKB1/SHC2/RAC1/RAP1B/RHOA/MAPK1/CAMK2G/YWHAE/SH2B2/RPS6KA1/YWHAB/PIK3CD
KEGG_LEUKOCYTE_TRANSENDOTHELIAL_MIGRATION	KEGG_LEUKOCYTE_TRANSENDOTHELIAL_MIGRATION	114	0.502395643338461	1.55275158329683	0.0000762206753251169	0.00140246042598215	0.000986857164735724	3935	tags=39%, list=20%, signal=32%	ROCK1/ROCK2/GNAI3/MAPK14/VAV3/PIK3CA/NCF2/PIK3CG/CYBB/PTK2B/MYL12A/RAP1A/CXCR4/MYL12B/PRKCB/NCF4/ITGAM/PIK3CB/CTNNB1/RAPGEF3/ICAM1/NCF1/NOX3/PLCG2/MAPK13/MYL5/CDC42/CLDN9/VASP/VAV1/CTNNA1/CLDN18/PIK3R5/RASSF5/RAC2/CDH5/MMP9/RAC1/GNAI1/RAP1B/AFDN/RHOA/GNAI2/F11R/ACTN1
KEGG_CYTOSOLIC_DNA_SENSING_PATHWAY	KEGG_CYTOSOLIC_DNA_SENSING_PATHWAY	53	0.579761240790456	1.69771175680474	0.0000901745790083407	0.00150837477613952	0.00106138499694028	1523	tags=26%, list=8%, signal=24%	CASP1/AIM2/TBK1/CHUK/ADAR/ZBP1/IL1B/IL18/IRF7/TREX1/RIPK1/CXCL10/NFKBIA/RIPK3
KEGG_EPITHELIAL_CELL_SIGNALING_IN_HELICOBACTER_PYLORI_INFECTION	KEGG_EPITHELIAL_CELL_SIGNALING_IN_HELICOBACTER_PYLORI_INFECTION	68	0.531636299773927	1.59132888967693	0.000131551564966467	0.00201712399615249	0.00141937214832241	3928	tags=44%, list=20%, signal=35%	CHUK/ADAM10/ATP6V1C1/MAPK14/ADAM17/ATP6V0A1/CASP3/LYN/ATP6V0E1/PAK1/ATP6V1B2/MAP2K4/NFKBIA/ATP6V1E1/ATP6V1G1/ATP6V1D/CXCR1/CXCR2/PLCG2/MAPK13/CDC42/NFKB1/ATP6V0D1/CXCL1/ATP6V0B/ATP6V1H/RAC1/ATP6V1A/ATP6V1F/F11R
KEGG_UBIQUITIN_MEDIATED_PROTEOLYSIS	KEGG_UBIQUITIN_MEDIATED_PROTEOLYSIS	134	0.473339508980189	1.47676375493589	0.000168911737390617	0.00239075074460565	0.001682278842028	4881	tags=43%, list=25%, signal=32%	BRCA1/UBE2J1/PIAS1/HERC4/CUL4B/COP1/UBA3/UBE2W/MAP3K1/UBE2L6/UBE2D1/UBE2D3/FANCL/HERC3/XIAP/NEDD4/UBE2A/UBA6/ANAPC13/UBR5/UBE2C/CUL3/UBE4A/PML/SOCS3/UBE2R2/CUL2/UBE2B/SOCS1/ELOC/ANAPC4/TRIP12/TRAF6/UBE2E1/CDC20/UBA7/CUL1/BIRC2/UBE2K/RCHY1/MDM2/KLHL9/ITCH/FBXW7/CUL5/WWP2/CBL/BIRC6/RNF7/UBE2QL1/UBE2S/ERCC8/UBE2N/BIRC3/SMURF2/SMURF1/CDC26
KEGG_LYSOSOME	KEGG_LYSOSOME	120	0.484885869153343	1.50785459236424	0.000182515170621471	0.00239877081388219	0.00168792225461962	4377	tags=41%, list=23%, signal=32%	CD164/LAMP2/AP3B1/CTSS/SCARB2/ASAH1/HEXB/ATP6V0A1/LAPTM4A/MANBA/SORT1/GNS/GALC/NPC2/LAMP3/NEU1/AP3S1/CTSL/AP1G1/CD63/PPT1/CTSZ/SLC17A5/SLC11A1/CTSD/CLTC/GM2A/CD68/PSAP/CLN5/ARSB/AP1S2/GLA/CLTCL1/DNASE2B/ATP6V0D1/IGF2R/ATP6V0B/ATP6V1H/LAPTM5/DNASE2/AP3M1/CTSH/IDS/CTSK/AP1M2/ENTPD4/PLA2G15/ARSG
KEGG_P53_SIGNALING_PATHWAY	KEGG_P53_SIGNALING_PATHWAY	68	0.514355398539999	1.53960255461498	0.000457527218252665	0.00561233387723269	0.00394918230491774	4213	tags=43%, list=22%, signal=33%	PTEN/APAF1/COP1/RRM2B/FAS/SHISA5/CASP3/SFN/GADD45B/CCNE2/PMAIP1/RRM2/PPM1D/CCNG2/CASP8/TP53I3/CDK1/BID/CHEK1/CCNB2/MDM4/RCHY1/MDM2/CCNE1/GTSE1/CD82/IGF1/CCNB1/ATM
KEGG_O_GLYCAN_BIOSYNTHESIS	KEGG_O_GLYCAN_BIOSYNTHESIS	30	0.61044184157254	1.67096335008399	0.000692377969050836	0.00796234664408461	0.00560279540745084	1153	tags=27%, list=6%, signal=25%	GALNT3/GALNT7/C1GALT1/GALNT4/C1GALT1C1/GALNT14/B4GALT5/GCNT1
KEGG_SNARE_INTERACTIONS_IN_VESICULAR_TRANSPORT	KEGG_SNARE_INTERACTIONS_IN_VESICULAR_TRANSPORT	38	0.584900704979132	1.65674755814706	0.000827927922491736	0.0081312259761209	0.0057216292623734	3207	tags=47%, list=17%, signal=40%	SEC22B/VAMP3/STX7/STX16/STX3/STX11/STX10/STX12/STX6/VAMP7/SNAP25/STX17/STX19/STX4/SNAP23/YKT6/VTI1A/VAMP5
KEGG_RENAL_CELL_CARCINOMA	KEGG_RENAL_CELL_CARCINOMA	70	0.518456191902309	1.55408201806251	0.000835554080504257	0.0081312259761209	0.0057216292623734	4466	tags=47%, list=23%, signal=36%	SOS2/HGF/HIF1A/PIK3CA/PIK3CG/VEGFA/TGFA/PAK1/KRAS/GAB1/EGLN1/BRAF/RAP1A/RAF1/CRK/SOS1/CUL2/PIK3CB/MAPK3/PAK2/ELOC/EPAS1/NRAS/CDC42/GRB2/PIK3R5/RAC1/FLCN/RAP1B/MAPK1/EP300/PIK3CD/PAK5
KEGG_APOPTOSIS	KEGG_APOPTOSIS	87	0.497251813085632	1.51828842508736	0.000868983841374084	0.0081312259761209	0.0057216292623734	2989	tags=36%, list=16%, signal=30%	TNFSF10/CHUK/APAF1/FAS/CFLAR/PIK3CA/IRAK4/IL1B/IRAK3/MYD88/PIK3CG/CASP3/CASP10/XIAP/RIPK1/CSF2RB/NFKBIA/TNFRSF10C/CASP8/TNFRSF1A/PIK3CB/CASP7/IL1R1/PPP3CA/BID/PRKAR1A/NGF/PIK3R5/NFKB1/BIRC2/IL1A
KEGG_SYSTEMIC_LUPUS_ERYTHEMATOSUS	KEGG_SYSTEMIC_LUPUS_ERYTHEMATOSUS	133	0.465270026026901	1.45071033199897	0.000883828910447924	0.0081312259761209	0.0057216292623734	5856	tags=47%, list=30%, signal=33%	FCGR1A/TRIM21/FCGR2C/FCGR3B/MACROH2A1/FCGR2A/IL10/H3-3B/FCGR3A/C1QB/H3-5/H3-3A/CD86/RO60/C5/C2/FCGR2B/H2BC9/H2BC18/C1QA/H2BC14/H2AC7/H2BC3/H3C8/C1QC/H2AZ1/H3C4/H2BC17/GRIN2B/H3C3/H2AC12/H3C7/CD80/H2BC21/SSB/H3Y2/H3C12/ACTN1/H2BC10/H3C2/H2BC13/H2BC7/H2AC4/H4C14/H2AB1/H4C15/H4C4/H3C15/H3C14/H2BC6/TNF/HLA-DRB1/H2AC14/H4C7/H2AB2/H2BC15/H3-4/HLA-DQB1/H2BC12/SNRPD1/H2AC17/H2AC21/H2AC13
KEGG_PANCREATIC_CANCER	KEGG_PANCREATIC_CANCER	70	0.515304293861515	1.54463414542743	0.000974224326212013	0.00853606076300049	0.00600649584581843	4484	tags=44%, list=23%, signal=34%	STAT1/CHUK/PLD1/TGFBR1/PIK3CA/BRCA2/PIK3CG/VEGFA/TGFA/RALB/RB1/KRAS/E2F3/BRAF/RAF1/PIK3CB/MAPK3/STAT3/CDC42/PIK3R5/NFKB1/SMAD2/RAC2/RAD51/ARHGEF6/RAC1/MAPK1/SMAD4/TGFBR2/PIK3CD/RALA
KEGG_FC_EPSILON_RI_SIGNALING_PATHWAY	KEGG_FC_EPSILON_RI_SIGNALING_PATHWAY	79	0.509041573388008	1.54171175570501	0.00106486017892667	0.00890610331465941	0.00626688047885073	2988	tags=35%, list=16%, signal=30%	MAP2K6/MAPK14/SOS2/VAV3/PLA2G4A/LCP2/PIK3CA/PIK3CG/FCER1G/LYN/GAB2/KRAS/PRKCD/BTK/MAP2K4/RAF1/SOS1/PRKCB/PIK3CB/MAPK3/PLCG2/MAPK13/NRAS/GRB2/VAV1/PIK3R5/PRKCE/RAC2
KEGG_CELL_CYCLE	KEGG_CELL_CYCLE	124	0.461475717654497	1.43494319299015	0.00139120931187374	0.0106659380576987	0.0075052081298452	4943	tags=45%, list=26%, signal=34%	STAG2/CDKN2B/YWHAZ/RAD21/SFN/GADD45B/RB1/CCNA2/CCNE2/E2F3/GSK3B/ANAPC13/CDC6/CCNA1/CDC25A/ORC3/STAG1/BUB1/CDK1/CCNH/TTK/ANAPC4/CDK7/CDC45/CHEK1/ESPL1/CDC20/CCNB2/CUL1/ORC4/SMC3/MCM4/SMAD2/MDM2/PTTG2/HDAC2/BUB1B/MAD2L2/CDC25C/CCNE1/ORC1/SMAD4/YWHAE/CCNB1/ORC2/ATM/YWHAB/EP300/CDKN2D/YWHAG/CREBBP/CDKN2C/CDK6/CDC26/MAD2L1/PCNA
KEGG_JAK_STAT_SIGNALING_PATHWAY	KEGG_JAK_STAT_SIGNALING_PATHWAY	154	0.45127686078149	1.41880101699983	0.00133459570078322	0.0106659380576987	0.0075052081298452	5265	tags=41%, list=27%, signal=30%	JAK2/STAM2/PIAS1/STAT1/IRF9/SOS2/IFNGR1/IFNAR1/IFNGR2/PIK3CA/STAT2/PIK3CG/OSM/IL10RB/IL10/OSMR/PRLR/IFNAR2/IFNK/CSF2RB/CSF2RA/CSF3R/SOS1/IL21/SOCS3/LIF/IL15/PIK3CB/STAT5B/SOCS1/IL19/STAT3/STAM/GRB2/IL13RA1/PIK3R5/IL2RG/SPRY3/SPRED2/IL6R/IL4R/IL6ST/STAT5A/SPRY4/JAK3/SOCS4/CBL/LIFR/IFNA13/PTPN6/SOCS2/EP300/PIK3CD/CISH/CREBBP/SOCS5/IL15RA/PRL/TYK2/CRLF2/PIAS2/IL12B/IFNA1
KEGG_PATHWAYS_IN_CANCER	KEGG_PATHWAYS_IN_CANCER	325	0.399498326606265	1.28652	0.00155549104624117	0.011448414100335	0.00805580626053323	5381	tags=38%, list=28%, signal=28%	PIAS1/STAT1/PTEN/CHUK/PLD1/TGFBR1/SOS2/HGF/APC/HIF1A/FAS/CDKN2B/PIK3CA/BRCA2/PIK3CG/CASP3/VEGFA/PTGS2/TGFA/RALB/RB1/KRAS/LAMB1/CCNE2/TPM3/XIAP/EGLN1/E2F3/GSK3B/BRAF/CSF2RA/RAF1/TCF7L2/CSF3R/CRK/STK4/NFKBIA/SOS1/GLI1/TPR/CASP8/CCNA1/PML/PRKCB/WNT5B/CUL2/RARA/SPI1/PIK3CB/STAT5B/MITF/FGF4/CTNNB1/PPARG/MAPK3/ELOC/STAT3/TRAF6/EPAS1/PLCG2/NRAS/CTBP2/FOS/WNT9B/BID/CDC42/GRB2/BIRC5/CTNNA1/PIK3R5/RASSF5/N…
KEGG_ACUTE_MYELOID_LEUKEMIA	KEGG_ACUTE_MYELOID_LEUKEMIA	57	0.527157204448545	1.55167500358557	0.00182580238738248	0.0129210630491684	0.0090920523744148	4544	tags=49%, list=24%, signal=38%	CHUK/SOS2/PIK3CA/PIK3CG/KRAS/BRAF/RAF1/TCF7L2/SOS1/CCNA1/PML/RARA/SPI1/PIK3CB/STAT5B/MAPK3/STAT3/NRAS/GRB2/PIK3R5/NFKB1/RPS6KB1/PIM2/STAT5A/MAPK1/JUP/PIK3CD/CEBPA
KEGG_PANTOTHENATE_AND_COA_BIOSYNTHESIS	KEGG_PANTOTHENATE_AND_COA_BIOSYNTHESIS	16	0.657084831208282	1.62104329335705	0.0033990616568448	0.023163975735535	0.016299593910016	3397	tags=56%, list=18%, signal=46%	DPYD/BCAT1/VNN2/PANK2/VNN1/PPCDC/UPB1/DPYS/PPCS
KEGG_PROSTATE_CANCER	KEGG_PROSTATE_CANCER	88	0.473146312674111	1.44718757939692	0.00421409746160908	0.0267377218253817	0.0188143008267846	4749	tags=42%, list=25%, signal=32%	PTEN/CHUK/SOS2/PIK3CA/CREB5/PIK3CG/TGFA/RB1/KRAS/CCNE2/E2F3/CREB1/GSK3B/BRAF/RAF1/TCF7L2/NFKBIA/SOS1/PIK3CB/CTNNB1/MAPK3/NRAS/GRB2/PIK3R5/NFKB1/HSP90B1/MDM2/PDGFRA/HSP90AA1/CCNE1/MAPK1/KLK3/IGF1/EP300/PIK3CD/CREB3L2/CREBBP
KEGG_MAPK_SIGNALING_PATHWAY	KEGG_MAPK_SIGNALING_PATHWAY	266	0.3997283389098	1.27800815173769	0.00412710749544871	0.0267377218253817	0.0188143008267846	4421	tags=33%, list=23%, signal=26%	STK3/MAP2K6/TAB2/CHUK/TGFBR1/MAPK14/MAP3K5/SOS2/HSPA6/FAS/MAP3K1/MAP3K2/PLA2G4A/DDIT3/IL1B/DUSP3/TAOK1/CASP3/LAMTOR3/CACNA1A/PPM1B/GADD45B/RASA2/PAK1/KRAS/CACNA1E/MAP2K4/RPS6KA3/RASA1/BRAF/MAP4K4/MKNK1/RAP1A/RAF1/CRK/STK4/NF1/DUSP6/SOS1/CD14/PRKCB/MAP3K8/RAPGEF2/DUSP1/TNFRSF1A/MAP3K20/ARRB2/FGF4/RASGRP4/MAPK3/PAK2/TRAF6/MAPK13/NRAS/IL1R1/PPP3CA/FOS/CDC42/HSPA1L/GRB2/ATF2/MAP3K3/NGF/IL1R2/NFKB1/FG…
KEGG_NON_SMALL_CELL_LUNG_CANCER	KEGG_NON_SMALL_CELL_LUNG_CANCER	54	0.510685513215195	1.49848667868965	0.00450556811529125	0.0276341511071197	0.0194450834449412	2718	tags=35%, list=14%, signal=30%	SOS2/PIK3CA/PIK3CG/TGFA/RB1/KRAS/E2F3/BRAF/RAF1/STK4/SOS1/PRKCB/PIK3CB/MAPK3/PLCG2/NRAS/GRB2/PIK3R5/RASSF5
KEGG_ENDOCYTOSIS	KEGG_ENDOCYTOSIS	181	0.416570199484163	1.31764559986334	0.00494507246726243	0.0293513978702028	0.0206534435814356	4371	tags=36%, list=23%, signal=28%	STAM2/SH3GLB1/CHMP5/PLD1/ACAP2/HSPA6/EPS15/CHMP2B/RAB11A/USP8/RAB5A/RAB31/NEDD4/GIT2/CHMP1B/ARAP2/CXCR4/PIKFYVE/PDCD6IP/CHMP3/HLA-B/HLA-F/VTA1/HLA-E/CXCR1/CLTC/HLA-C/ARRB2/HLA-G/TRAF6/CXCR2/HLA-A/CDC42/STAM/EEA1/HSPA1L/VPS4B/ARFGAP3/STAMBP/SMAP1/ADRB1/MVB12A/CLTCL1/RAB11FIP1/IL2RG/TSG101/ASAP1/VPS37A/MDM2/VPS36/RAB11FIP2/VPS25/CHMP2A/HSPA1A/PDGFRA/ITCH/SH3KBP1/GRK1/HSPA1B/VPS45/ARAP1/CBL/PIP5K1A/…
KEGG_REGULATION_OF_ACTIN_CYTOSKELETON	KEGG_REGULATION_OF_ACTIN_CYTOSKELETON	209	0.408168202686523	1.29590326362622	0.00583740084204028	0.0335650548417316	0.0236184310385182	5350	tags=39%, list=28%, signal=28%	ROCK1/ROCK2/PPP1R12A/SOS2/VAV3/APC/PIK3CA/ITGA1/GNA13/PIK3CG/ARPC5/LIMK2/DIAPH2/PAK1/KRAS/ITGA8/ITGA7/BRAF/MYL12A/RAF1/CRK/ARPC2/MYL12B/SOS1/PIKFYVE/CD14/ARPC3/IQGAP1/ITGAM/PIK3CB/FGF4/MAPK3/PAK2/MYH10/DOCK1/PFN2/MYL5/NCKAP1L/NRAS/RDX/CDC42/VAV1/TMSB4X/CHRM2/PIK3R5/SSH2/IQGAP2/FGF13/IQGAP3/RAC2/ARHGEF6/FGD3/FGF11/RAC1/PPP1CB/PDGFRA/WAS/ITGAV/MYLK3/RHOA/ITGAX/CYFIP1/MAPK1/ACTN1/PIP4K2C/ITGA4/PIP5K…
KEGG_GNRH_SIGNALING_PATHWAY	KEGG_GNRH_SIGNALING_PATHWAY	101	0.448915927945295	1.38192210813495	0.00630245426221645	0.035140957098419	0.0247273325120454	2553	tags=25%, list=13%, signal=22%	MAP2K6/PLD1/MAPK14/SOS2/MAP3K1/MAP3K2/PLA2G4A/ADCY4/KRAS/PTK2B/PRKCD/MAP2K4/RAF1/CALM2/SOS1/GNAQ/PRKCB/ITPR2/MAPK3/MAPK13/NRAS/CDC42/GRB2/GNRH1/MAP3K3
KEGG_OOCYTE_MEIOSIS	KEGG_OOCYTE_MEIOSIS	110	0.446124423827981	1.37641	0.00658759030553335	0.0356504887122981	0.0250858702037338	6420	tags=51%, list=33%, signal=34%	SLK/ADCY4/YWHAZ/CCNE2/PPP2R5A/RPS6KA3/ANAPC13/CALM2/REC8/BUB1/CDK1/ITPR2/MAPK3/ANAPC4/PPP3CA/PPP2CA/ESPL1/CDC20/CCNB2/CUL1/SGO1/SMC3/PTTG2/PPP2R5E/PPP1CB/MAD2L2/CDC25C/CCNE1/MAPK1/CAMK2G/YWHAE/IGF1/CCNB1/PPP2CB/AURKA/RPS6KA1/YWHAB/PPP2R5C/FBXO5/PPP3CB/FBXO43/YWHAG/STAG3/CDC26/PPP1CC/MAD2L1/PTTG1/CHP2/PPP3R2/ADCY7/CDC27/PKMYT1/ANAPC10/SPDYA/PRKX/YWHAH
KEGG_PROTEASOME	KEGG_PROTEASOME	44	0.524119763093271	1.50614695839131	0.00710180274991449	0.0368863300685901	0.0259554839727494	5300	tags=57%, list=28%, signal=41%	PSMB9/PSMB8/POMP/PSME2/PSMC6/PSME1/PSMD6/PSMA4/PSMA3/PSMC1/PSMA6/PSMD4/PSMB1/PSMC2/PSMD12/PSMD14/PSMA2/PSMD1/PSMA1/PSMB3/PSMD7/PSMD13/PSMA7/PSMB2/PSMA5
KEGG_ENDOMETRIAL_CANCER	KEGG_ENDOMETRIAL_CANCER	52	0.504036154230864	1.47730979169349	0.00721689066559372	0.0368863300685901	0.0259554839727494	2705	tags=35%, list=14%, signal=30%	PTEN/SOS2/APC/PIK3CA/PIK3CG/KRAS/GSK3B/BRAF/RAF1/TCF7L2/SOS1/PIK3CB/CTNNB1/MAPK3/NRAS/GRB2/CTNNA1/PIK3R5
KEGG_RNA_DEGRADATION	KEGG_RNA_DEGRADATION	54	0.499428204652167	1.46545475104911	0.00783810107672171	0.0389512658074045	0.0274084993953704	6407	tags=57%, list=33%, signal=38%	XRN1/DCP2/PAPOLA/PATL1/PNPT1/PAPOLG/CNOT8/CNOT6/DIS3/CNOT4/C1D/CNOT2/LSM3/XRN2/PARN/CNOT1/EXOSC9/ZCCHC7/CNOT7/DCP1A/LSM8/MTREX/EXOSC8/HSPD1/LSM1/MPHOSPH6/EXOSC3/DCPS/CNOT6L/EXOSC1/ENO1
KEGG_CHRONIC_MYELOID_LEUKEMIA	KEGG_CHRONIC_MYELOID_LEUKEMIA	73	0.471462781078622	1.41782473311238	0.00804428315587701	0.0389512658074045	0.0274084993953704	4434	tags=42%, list=23%, signal=33%	CHUK/TGFBR1/SOS2/PIK3CA/PIK3CG/RB1/GAB2/KRAS/E2F3/BRAF/RAF1/CRK/NFKBIA/SOS1/PIK3CB/STAT5B/MAPK3/NRAS/CTBP2/GRB2/PIK3R5/NFKB1/SHC2/MDM2/HDAC2/STAT5A/MAPK1/SMAD4/TGFBR2/CBL/PIK3CD
KEGG_COLORECTAL_CANCER	KEGG_COLORECTAL_CANCER	62	0.487523168206574	1.44355624206794	0.00870696300352629	0.0410790049397138	0.0289057071372128	4023	tags=42%, list=21%, signal=33%	TGFBR1/APC/PIK3CA/PIK3CG/CASP3/KRAS/GSK3B/BRAF/RAF1/TCF7L2/PIK3CB/CTNNB1/MAPK3/FOS/BIRC5/PIK3R5/SMAD2/RAC2/MSH6/RAC1/MSH3/DCC/RHOA/MAPK1/SMAD4/TGFBR2
KEGG_DORSO_VENTRAL_AXIS_FORMATION	KEGG_DORSO_VENTRAL_AXIS_FORMATION	24	0.573261104683999	1.52614625936461	0.00930083320666709	0.0427838327506686	0.0301053285373698	3821	tags=46%, list=20%, signal=37%	SOS2/KRAS/ETV6/ETV7/ETS2/SOS1/MAPK3/PIWIL4/GRB2/NOTCH2/MAPK1
KEGG_PROTEIN_EXPORT	KEGG_PROTEIN_EXPORT	23	0.571296752790505	1.50454720612402	0.0103648902833705	0.0465156051741506	0.0327312324738016	5813	tags=61%, list=30%, signal=43%	SRP54/SRP19/SEC11A/SRP9/SPCS3/SEC63/SRP14/SEC61A2/HSPA5/SPCS2/SEC61B/SRP72/SEC11C/SEC61G
KEGG_SPHINGOLIPID_METABOLISM	KEGG_SPHINGOLIPID_METABOLISM	38	0.527144019348225	1.49315013542026	0.0112205705071909	0.0491567850791218	0.0345897286311899	2487	tags=29%, list=13%, signal=25%	SPTLC2/DEGS1/ASAH1/SPTLC1/GALC/SGMS1/NEU1/UGCG/SGMS2/ACER3/GLA

## Sheet: CXCL10_GSEA_res
ID	Description	setSize	enrichmentScore	NES	pvalue	p.adjust	qvalue	rank	leading_edge	core_enrichment
KEGG_SYSTEMIC_LUPUS_ERYTHEMATOSUS	KEGG_SYSTEMIC_LUPUS_ERYTHEMATOSUS	133	0.505130901343441	1.74657476645378	0.0000000420437205640747	0.0000071474324958927	0.00000526652920749988	3916	tags=44%, list=20%, signal=35%	H2BC9/SSB/H2AC4/HLA-DQA1/C2/CD86/H3C8/H2BC10/H3C7/H4C4/H2BC14/CD80/SNRPD1/H4C15/H4C14/H2AC14/FCGR1A/H2AC16/H2AC12/TNF/H2AC7/MACROH2A2/H3C3/TRIM21/HLA-DQB1/H3C15/H3C12/H3C14/H2BC17/H2AC15/HLA-DRA/H2BC15/H3C2/H2BC3/H2AC17/HLA-DRB1/H2AB1/H3C4/C5/H4C1/RO60/HLA-DRB5/IFNG/H4C6/H4C9/H2BC7/H3C1/H2AC13/H3C6/H2BC6/HLA-DMA/H2BC8/H2BC11/IL10/H4C8/CD40/H2BC13/H2AC8
KEGG_PROTEASOME	KEGG_PROTEASOME	44	0.605971097640935	1.91117399357633	0.00000328653673873287	0.000186237081861529	0.000137227323476916	4885	tags=68%, list=25%, signal=51%	PSME2/PSMA6/PSMA4/PSMB9/PSMA5/PSMC2/PSMD14/PSMD12/PSMA3/POMP/PSMC6/PSMD11/PSME1/PSMB7/PSMA2/PSMB8/PSMB2/PSMA1/IFNG/PSMC5/PSMC3/PSMC1/PSMB6/PSMB1/PSMD7/PSMD6/PSMD1/PSMA7/PSMB5/PSMA8
KEGG_CELL_CYCLE	KEGG_CELL_CYCLE	124	0.483414271242594	1.66411572650309	0.00000225960952758988	0.000186237081861529	0.000137227323476916	5948	tags=58%, list=31%, signal=40%	PTTG1/CCNA2/CHEK1/CUL1/CCNB1/CDK1/ANAPC4/MAD2L1/BUB1/CDC20/ORC3/CDC25A/GADD45B/PCNA/CCNE1/RB1/TTK/YWHAE/ORC5/MCM4/CDK6/E2F5/MCM6/CCNB2/ATR/SMC3/ORC4/CDC6/ANAPC10/CHEK2/BUB1B/DBF4/CDC7/CDC14A/CDKN2B/CCNE2/ORC6/CCNH/WEE2/CCNB3/ATM/ORC2/ANAPC13/CDC45/CDKN2A/HDAC2/ORC1/RBL1/CDKN2C/CDK2/ESPL1/SFN/WEE1/SKP2/E2F1/SMAD4/ANAPC7/SMC1B/MCM2/CDK4/CDC16/CDC23/MCM7/CDK7/MAD2L2/SMAD3/SMAD2/STAG1/ANAPC5/ANAPC11/…
KEGG_SPLICEOSOME	KEGG_SPLICEOSOME	126	0.473507329161178	1.63332358631153	0.000008005065707941	0.000340215292587493	0.000250684952432889	6540	tags=60%, list=34%, signal=40%	PHF5A/PRPF40A/LSM5/SRSF3/SNRNP27/U2SURP/PRPF38A/SNRPD1/CDC40/HNRNPA3/SNRPF/PLRG1/SNRPG/THOC2/LSM3/TRA2A/SRSF7/HSPA8/SRSF10/BCAS2/TRA2B/SNRPC/PRPF38B/CWC15/LSM7/LSM8/MAGOHB/MAGOH/SRSF6/SNRPD2/SNRPA1/PPIL1/CDC5L/SNRPB2/NCBP2/RBM25/CCDC12/SNRNP40/TCERG1/PPIH/SF3B5/DDX5/RBMX/THOC1/AQR/DHX15/RBM22/NCBP1/ALYREF/SNRPE/SRSF2/HNRNPA1L2/PRPF3/SF3B6/SRSF1/SLU7/LSM6/RBM17/HNRNPA1/SNRPD3/SF3A3/THOC3/WBP11/SRS…
KEGG_OXIDATIVE_PHOSPHORYLATION	KEGG_OXIDATIVE_PHOSPHORYLATION	116	0.482034350145633	1.65426078768713	0.0000131692294725267	0.000447753802065909	0.000329923854153828	5047	tags=54%, list=26%, signal=40%	ATP6V1G1/ATP5F1C/NDUFV2/COX6C/NDUFA7/NDUFB4/COX17/UQCRC2/NDUFAB1/UQCR10/UQCRQ/NDUFA9/COX7A2/PPA1/NDUFB5/UQCRFS1/NDUFA5/NDUFB8/COX7B/ATP5MC3/COX5A/PPA2/ATP5PO/NDUFB9/NDUFA8/NDUFS4/ATP5PF/NDUFA4/UQCRHL/COX10/NDUFB2/NDUFS3/NDUFS6/NDUFB1/ATP5MG/ATP5PB/ATP6V1G3/UQCRH/COX11/ATP6V0A1/ATP6V1F/ATP5MC1/COX6A1/COX15/COX7C/ATP6V1C2/COX4I1/NDUFB7/COX7A2L/ATP5MF/NDUFA6/SDHC/NDUFC1/ATP6V1H/NDUFS1/CYC1/NDUFC2/AT…
KEGG_RNA_DEGRADATION	KEGG_RNA_DEGRADATION	54	0.554504827961036	1.78410263290928	0.0000271207237553306	0.000768420506401035	0.00056620458366392	5194	tags=63%, list=27%, signal=46%	PNPT1/XRN1/PATL1/LSM5/EXOSC9/EXOSC1/DIS3/EXOSC8/LSM3/DCP1A/ZCCHC7/EXOSC3/MPHOSPH6/MTREX/LSM7/LSM8/CNOT4/PARN/CNOT6L/HSPD1/CNOT2/PAPOLG/CNOT8/EXOSC2/C1D/CNOT9/EXOSC7/CNOT6/CNOT7/LSM6/EXOSC6/PAPOLA/CNOT10/ENO3
KEGG_ADHERENS_JUNCTION	KEGG_ADHERENS_JUNCTION	73	-0.310361	-1.80684	0.0000907878702028548	0.00220484827635504	0.0016246250457353	2261	tags=32%, list=12%, signal=28%	TGFBR2/CDH1/SORBS1/RAC1/BAIAP2/WAS/ACTG1/MAPK3/WASF3/CTNNA2/IQGAP1/PARD3/ACTN4/PTPRF/RHOA/ACTB/VCL/ACTN1/PTPRJ/NECTIN1/MAPK1/WASF2/IGF1R
KEGG_RIBOSOME	KEGG_RIBOSOME	86	0.491874538886609	1.65117872170008	0.000110872111572267	0.00235603237091067	0.00173602385224996	8406	tags=84%, list=44%, signal=47%	MRPL13/RPS27L/RSL24D1/RPS7/RPL27/RPL35/RPL9/RPS9/RPS3A/RPL17/RPL31/RPS29/RPSA/RPS21/RPS18/RPLP0/RPL39/RPS17/RPL11/FAU/RPS10/RPL6/RPS24/RPL41/RPL24/RPL22L1/RPL28/RPL23/RPS6/RPL5/RPL15/RPS15A/RPL14/RPS20/RPL34/RPL30/RPL13A/RPS27/RPL29/RPL37/RPL36/RPL26/RPS16/RPS13/RPL27A/RPS27A/RPL4/RPS8/RPL32/RPS11/RPL26L1/RPS25/RPL7/RPL12/RPS5/RPL18A/RPL10A/RPS3/RPL35A/RPL37A/RPS19/RPLP1/RPS26/RPL36A/RPL19/RPL38/…
KEGG_PARKINSONS_DISEASE	KEGG_PARKINSONS_DISEASE	113	0.46080742420556	1.57684973449357	0.00012621259313408	0.00238401564808817	0.0017566431091176	5047	tags=51%, list=26%, signal=38%	UBE2L6/ATP5F1C/NDUFV2/COX6C/NDUFA7/NDUFB4/CYCS/UQCRC2/NDUFAB1/CASP3/UQCR10/UQCRQ/NDUFA9/COX7A2/UCHL1/NDUFB5/UQCRFS1/NDUFA5/NDUFB8/UBA7/COX7B/ATP5MC3/COX5A/ATP5PO/NDUFB9/NDUFA8/NDUFS4/ATP5PF/NDUFA4/UQCRHL/NDUFB2/UBE2L3/NDUFS3/NDUFS6/NDUFB1/ATP5PB/UQCRH/ATP5MC1/COX6A1/COX7C/COX4I1/PPID/NDUFB7/COX7A2L/NDUFA6/SLC25A4/SDHC/NDUFC1/NDUFS1/SLC25A31/CYC1/NDUFC2/ATP5MC2/NDUFS5/ATP5F1A/ATP5PD/UBE2G2/COX5B
KEGG_PATHOGENIC_ESCHERICHIA_COLI_INFECTION	KEGG_PATHOGENIC_ESCHERICHIA_COLI_INFECTION	55	-0.323168	-1.75062	0.000574039375649874	0.00975866938604786	0.00719059849498263	2223	tags=35%, list=12%, signal=31%	CDH1/TUBA1C/NCK2/TUBB3/WAS/ACTG1/HCLS1/CLDN1/ARPC4/ARHGEF2/ARPC1B/TUBA8/RHOA/ACTB/TUBA1A/TUBB1/CTTN/TUBA4A/TUBB4B
KEGG_NON_SMALL_CELL_LUNG_CANCER	KEGG_NON_SMALL_CELL_LUNG_CANCER	54	-0.32582	-1.73763	0.000703819221728922	0.0108772061539924	0.00801478348188916	1437	tags=30%, list=7%, signal=27%	PLCG2/E2F3/AKT2/PIK3CD/PIK3R2/MAPK3/GRB2/EGF/BAD/E2F2/AKT1/PDPK1/MAP2K2/MAPK1/RXRA/FOXO3
KEGG_P53_SIGNALING_PATHWAY	KEGG_P53_SIGNALING_PATHWAY	68	0.483566203456397	1.58840135601876	0.000811123808622389	0.0114909206221505	0.00846699414263722	3954	tags=44%, list=21%, signal=35%	PMAIP1/CHEK1/RRM2/CCNB1/CDK1/RCHY1/CYCS/GTSE1/CASP3/SHISA5/GADD45B/CCNE1/DDB2/FAS/CDK6/CCNB2/ATR/IGF1/CHEK2/CCNE2/MDM4/CCNB3/ATM/TP53I3/EI24/PERP/CDKN2A/BAX/CDK2/SFN
KEGG_TERPENOID_BACKBONE_BIOSYNTHESIS	KEGG_TERPENOID_BACKBONE_BIOSYNTHESIS	15	0.658771241449652	1.73502993862826	0.0029450236952071	0.038462265337503	0.0283406165644759	5400	tags=73%, list=28%, signal=53%	HMGCS1/ACAT1/GGPS1/PDSS2/FDPS/PDSS1/DHDDS/PMVK/ACAT2/IDI2/IDI1
KEGG_RIG_I_LIKE_RECEPTOR_SIGNALING_PATHWAY	KEGG_RIG_I_LIKE_RECEPTOR_SIGNALING_PATHWAY	69	0.453947139804013	1.49268822652403	0.00316748067485319	0.038462265337503	0.0283406165644759	3139	tags=28%, list=16%, signal=23%	CXCL10/IFIH1/DHX58/ISG15/IRF7/AZI2/CYLD/CASP10/TBK1/TNF/ATG5/SIKE1/TRAF6/ATG12/MAPK11/TRIM25/TANK/IKBKE/RIPK1
KEGG_ALLOGRAFT_REJECTION	KEGG_ALLOGRAFT_REJECTION	35	0.530238130291384	1.61805868570235	0.00374229104352631	0.0391975754022256	0.0288824239805873	7228	tags=69%, list=38%, signal=43%	HLA-DQA1/CD86/CD80/TNF/HLA-DQB1/FAS/HLA-DRA/HLA-DRB1/HLA-DRB5/IFNG/HLA-DMA/IL10/HLA-F/CD40/CD28/HLA-A/HLA-DMB/HLA-C/IL2/HLA-DPB1/HLA-DPA1/IL5/FASLG/HLA-DOB
KEGG_HOMOLOGOUS_RECOMBINATION	KEGG_HOMOLOGOUS_RECOMBINATION	28	0.549674732749458	1.61608284815225	0.00453686005036231	0.0391975754022256	0.0288824239805873	1697	tags=36%, list=9%, signal=33%	BRCA2/NBN/XRCC2/RAD51/RPA3/RPA4/BLM/RAD50/RAD54L/RAD51C
KEGG_MISMATCH_REPAIR	KEGG_MISMATCH_REPAIR	23	0.566092184224172	1.60892868299918	0.00461147945908537	0.0391975754022256	0.0288824239805873	5361	tags=65%, list=28%, signal=47%	RPA3/RPA4/RFC4/PCNA/MLH1/RFC5/RFC3/SSBP1/MSH2/MLH3/RFC1/MSH6/MSH3/PMS2/EXO1
KEGG_ACUTE_MYELOID_LEUKEMIA	KEGG_ACUTE_MYELOID_LEUKEMIA	57	-0.284001	-1.56487	0.00422317151913321	0.0391975754022256	0.0288824239805873	1783	tags=30%, list=9%, signal=27%	STAT5A/STAT3/AKT2/PIK3CD/IKBKG/PIK3R2/MAPK3/GRB2/BAD/AKT1/STAT5B/ZBTB16/MAP2K2/KIT/PIM1/MAPK1/FLT3
KEGG_UBIQUITIN_MEDIATED_PROTEOLYSIS	KEGG_UBIQUITIN_MEDIATED_PROTEOLYSIS	134	0.396996806967808	1.37296814523522	0.00405679997548782	0.0391975754022256	0.0288824239805873	6360	tags=48%, list=33%, signal=32%	FANCL/SOCS1/UBE2L6/PML/BIRC3/UBE2S/CUL1/ANAPC4/CUL2/UBA6/CDC20/RCHY1/CUL5/KLHL9/RNF7/UBE2N/UBA3/DDB2/UBE2E1/UBA7/BRCA1/ERCC8/ANAPC10/UBA2/UBE2A/TRAF6/UBE2K/FBXO4/RHOBTB2/WWP1/UBE2L3/UBE3A/UBE2Q2/ANAPC13/NEDD4/ELOC/FBXW7/CUL4B/PIAS1/CBLB/TRIM37/SKP2/UBE2D2/HERC4/UBE4A/MAP3K1/ANAPC7/XIAP/UBE2G2/CDC16/UBE3C/CDC23/SAE1/UBE2C/UBE2D4/BIRC2/ANAPC5/ANAPC11/UBE2Z/UBE2E2/BIRC6/FBXW8/AIRE/UBE2W
KEGG_HUNTINGTONS_DISEASE	KEGG_HUNTINGTONS_DISEASE	172	0.383480056639973	1.3508117691074	0.00435453869558356	0.0391975754022256	0.0288824239805873	6688	tags=49%, list=35%, signal=32%	ATP5F1C/NDUFV2/COX6C/POLR2K/NDUFA7/NDUFB4/CYCS/UQCRC2/NDUFAB1/CASP3/UQCR10/UQCRQ/NDUFA9/COX7A2/NDUFB5/UQCRFS1/NDUFA5/NDUFB8/COX7B/ATP5MC3/COX5A/CREB3L2/ATP5PO/NDUFB9/NDUFA8/NDUFS4/DNALI1/ATP5PF/NDUFA4/UQCRHL/NDUFB2/TAF4B/NDUFS3/CREB3/IFT57/NDUFS6/NDUFB1/HAP1/ATP5PB/UQCRH/HDAC2/ATP5MC1/BAX/REST/COX6A1/COX7C/COX4I1/PPID/NDUFB7/COX7A2L/NDUFA6/SLC25A4/SDHC/CLTA/NDUFC1/NDUFS1/SLC25A31/CYC1/NDUFC2/POLR…
KEGG_PROTEIN_EXPORT	KEGG_PROTEIN_EXPORT	23	0.561603402580967	1.5961708146895	0.00542765081110712	0.0439381256137243	0.0323754609785337	5724	tags=65%, list=30%, signal=46%	SEC11C/SRP72/SRP19/SEC61G/SRP9/SPCS2/SEC63/SPCS3/SPCS1/SEC61B/SRP54/SRP14/SEC11A/IMMP1L/OXA1L
KEGG_ENDOMETRIAL_CANCER	KEGG_ENDOMETRIAL_CANCER	52	-0.289198	-1.52189	0.00676807890078403	0.0479405588805535	0.0353246223330395	1355	tags=25%, list=7%, signal=23%	AKT2/PIK3CD/PIK3R2/MAPK3/GRB2/EGF/CTNNA2/BAD/AKT1/PDPK1/MAP2K2/MAPK1/FOXO3
KEGG_NOD_LIKE_RECEPTOR_SIGNALING_PATHWAY	KEGG_NOD_LIKE_RECEPTOR_SIGNALING_PATHWAY	62	0.447456392959028	1.46317648511271	0.00655674115115743	0.0479405588805535	0.0353246223330395	5758	tags=47%, list=30%, signal=33%	CCL2/CCL8/BIRC3/RIPK2/CASP1/HSP90AA1/NOD1/TNF/TNFAIP3/CARD6/TRAF6/MAPK11/SUGT1/CASP5/TAB3/HSP90B1/NOD2/CCL11/MAP3K7/TRIP6/HSP90AB1/IL18/XIAP/CHUK/CARD8/CXCL8/ERBIN/CXCL2/BIRC2
KEGG_CHRONIC_MYELOID_LEUKEMIA	KEGG_CHRONIC_MYELOID_LEUKEMIA	73	-0.247137	-1.43877	0.00658694755317029	0.0479405588805535	0.0353246223330395	2388	tags=33%, list=12%, signal=29%	MDM2/BCR/TGFBR2/NFKBIA/STAT5A/MECOM/E2F3/AKT2/PIK3CD/IKBKG/PIK3R2/MAPK3/CTBP2/CBL/CBLC/GRB2/BAD/E2F2/AKT1/STAT5B/CRKL/BCL2L1/MAP2K2/MAPK1
